# Supplementary material for: Prognostic implications of autophagy-associated gene signatures in non-small cell lung cancer
Source: PubMed Central journal article supplement (PMC6932887; doi:10.18632/aging.102544), 2019-12-07
Supplement: aging-11-102544-s002..pdf [file aging-11-102544-s002..pdf]

SUPPLEMENTARY FIGURES

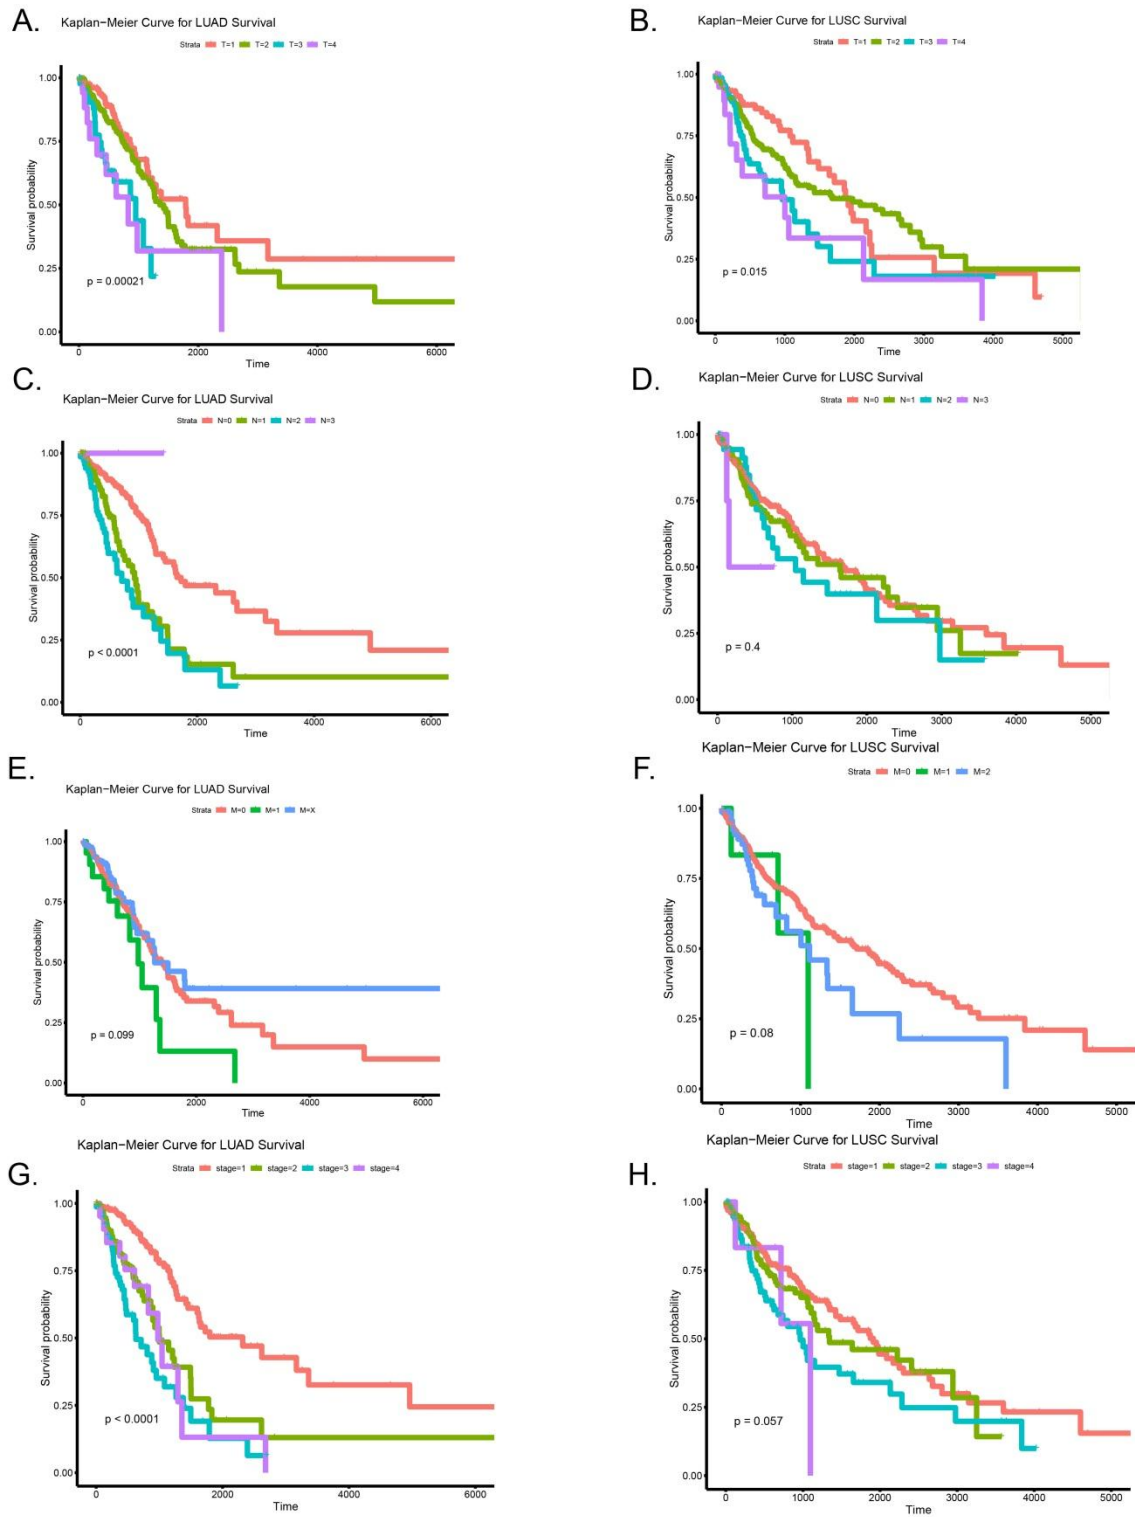

**Supplementary Figure 1. Kaplan-Meier survival curves regarding the clinical features in TCGA lung cancer cohorts. Survival curves for LUAD (A, C, E, and G) and LUSC (B, D, F, and H) were exhibited on the left and right panels, respectively.**

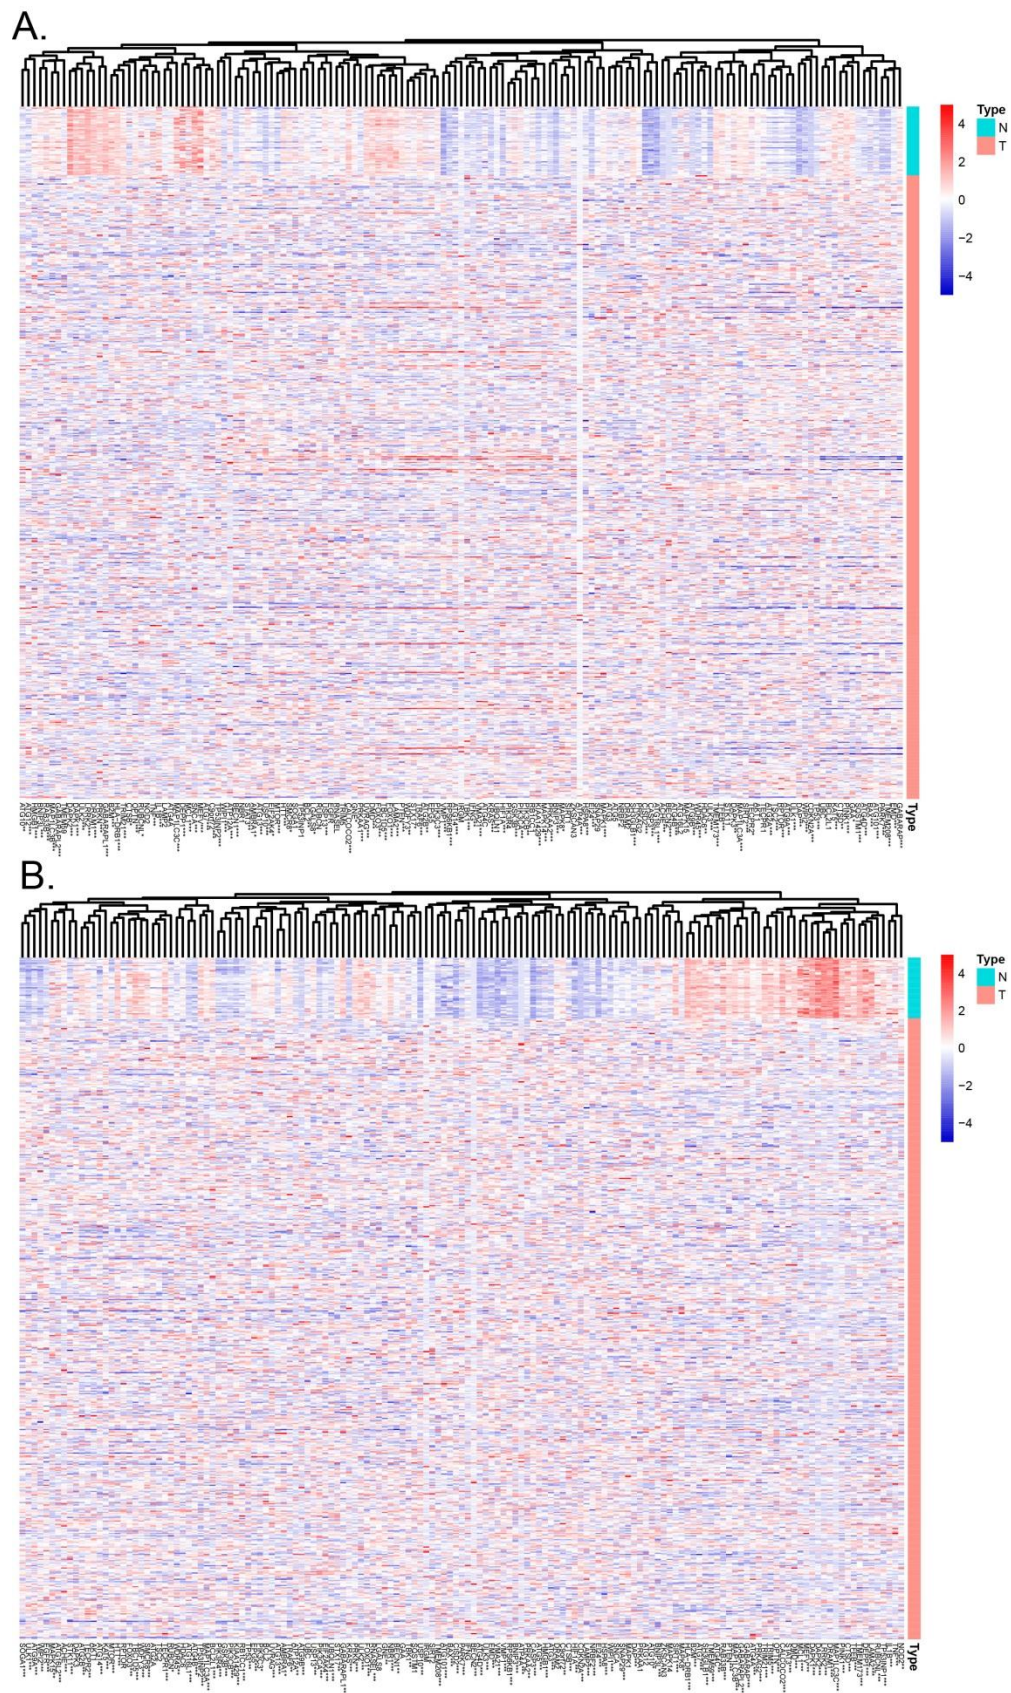

**Supplementary Figure 2. mRNA expression profiles of 148 autophagy-associated genes in TCGA lung cancer cohorts.** Gene expression profiles for LUAD (A) and LUSC (B) were exhibited in the up and low panels, respectively.

A.

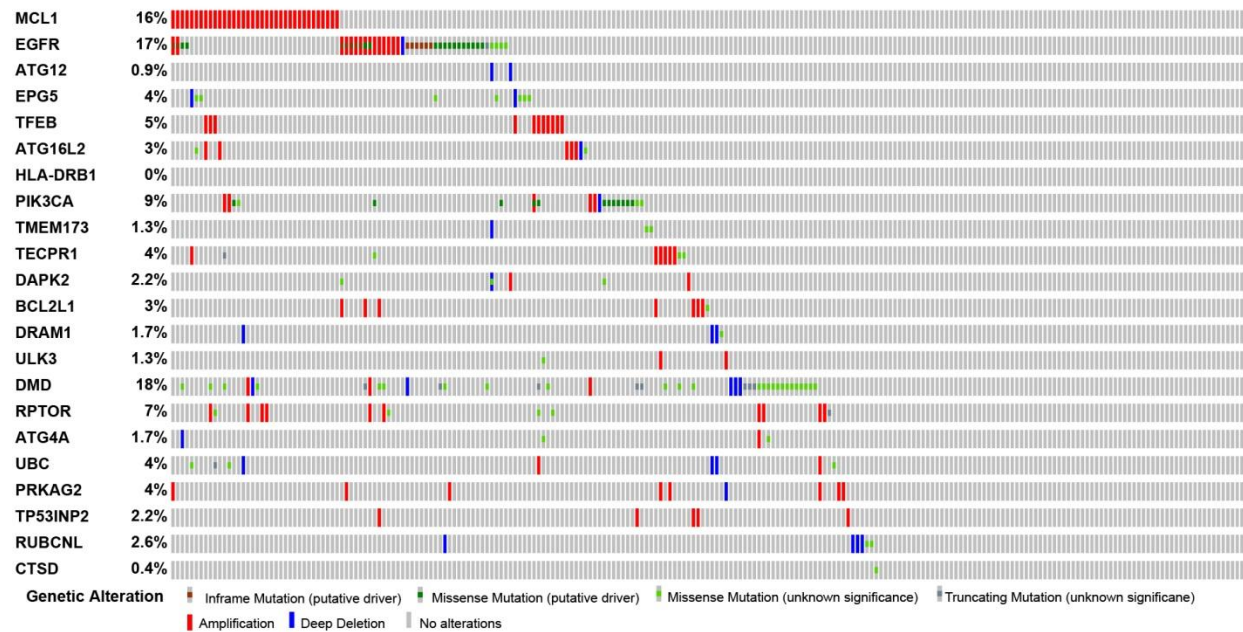

B.

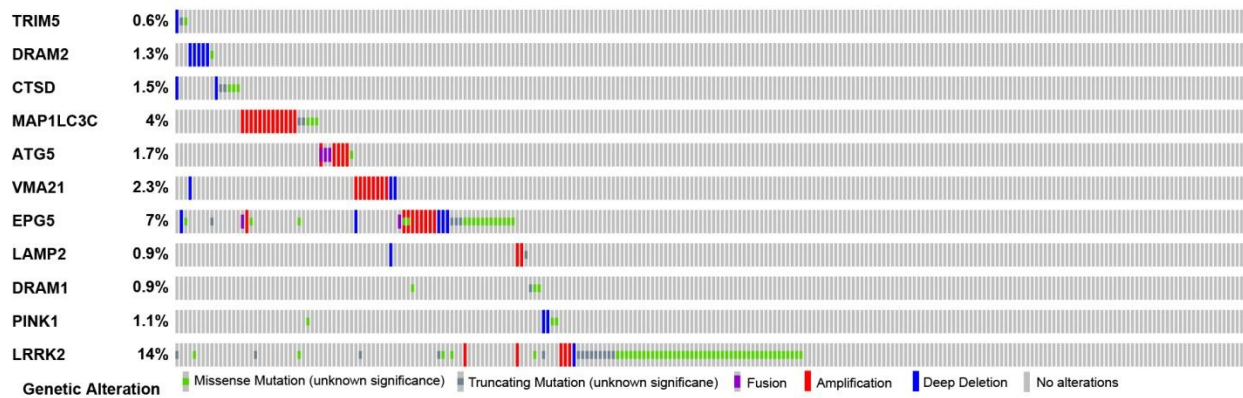

**Supplementary Figure 3. Genetic alteration of genes included in the gene signatures (TCGA, PanCancer Atlas).** (A) Genetic alteration of the 22 genes in the TCGA-LUAD cohort. (B) Genetic alteration of the 11 genes in the TCGA-LUSC cohort.
